# Supplementary material for: Limits of ZnO Electrodeposition in Mesoporous Tin Doped Indium Oxide Films in View of Application in Dye-Sensitized Solar Cells
Source: MDPI journal article supplement (doi:10.3390/ma7043291), 2014-04-23

## Supplementary

**Figure S1.** UV-vis spectra in transmission of the ITO substrate and mesoporous ITO films templated with the block copolymers PIB-PEO 3000 and PIB-PEO 20000. The spectra were recorded with a Varian Cary 4000.

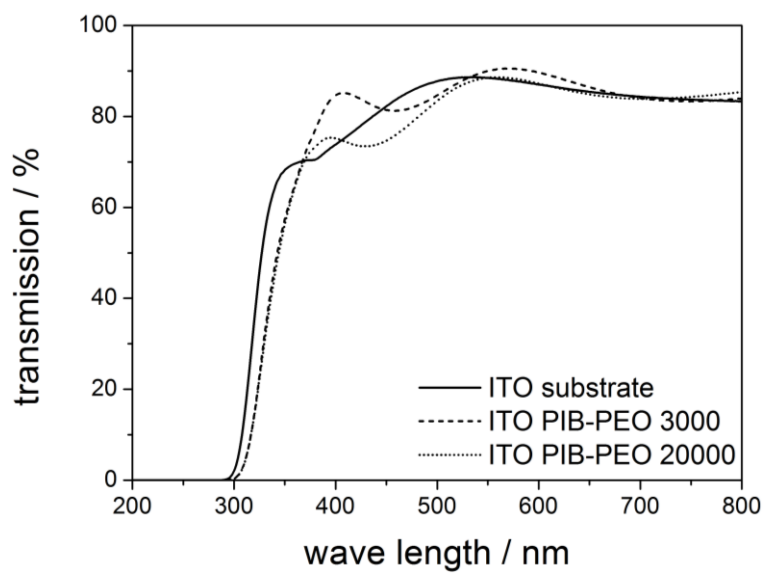

Supplement: s1 [file s1]
